# Supplementary figures and images for: Positioned and G/C-capped poly(dA:dT) tracts associate with the centers of nucleosome-free regions in yeast promoters
Source: HighWire-hosted journal article supplement (doi:10.1101/gr.103226.109), 2010-02-04

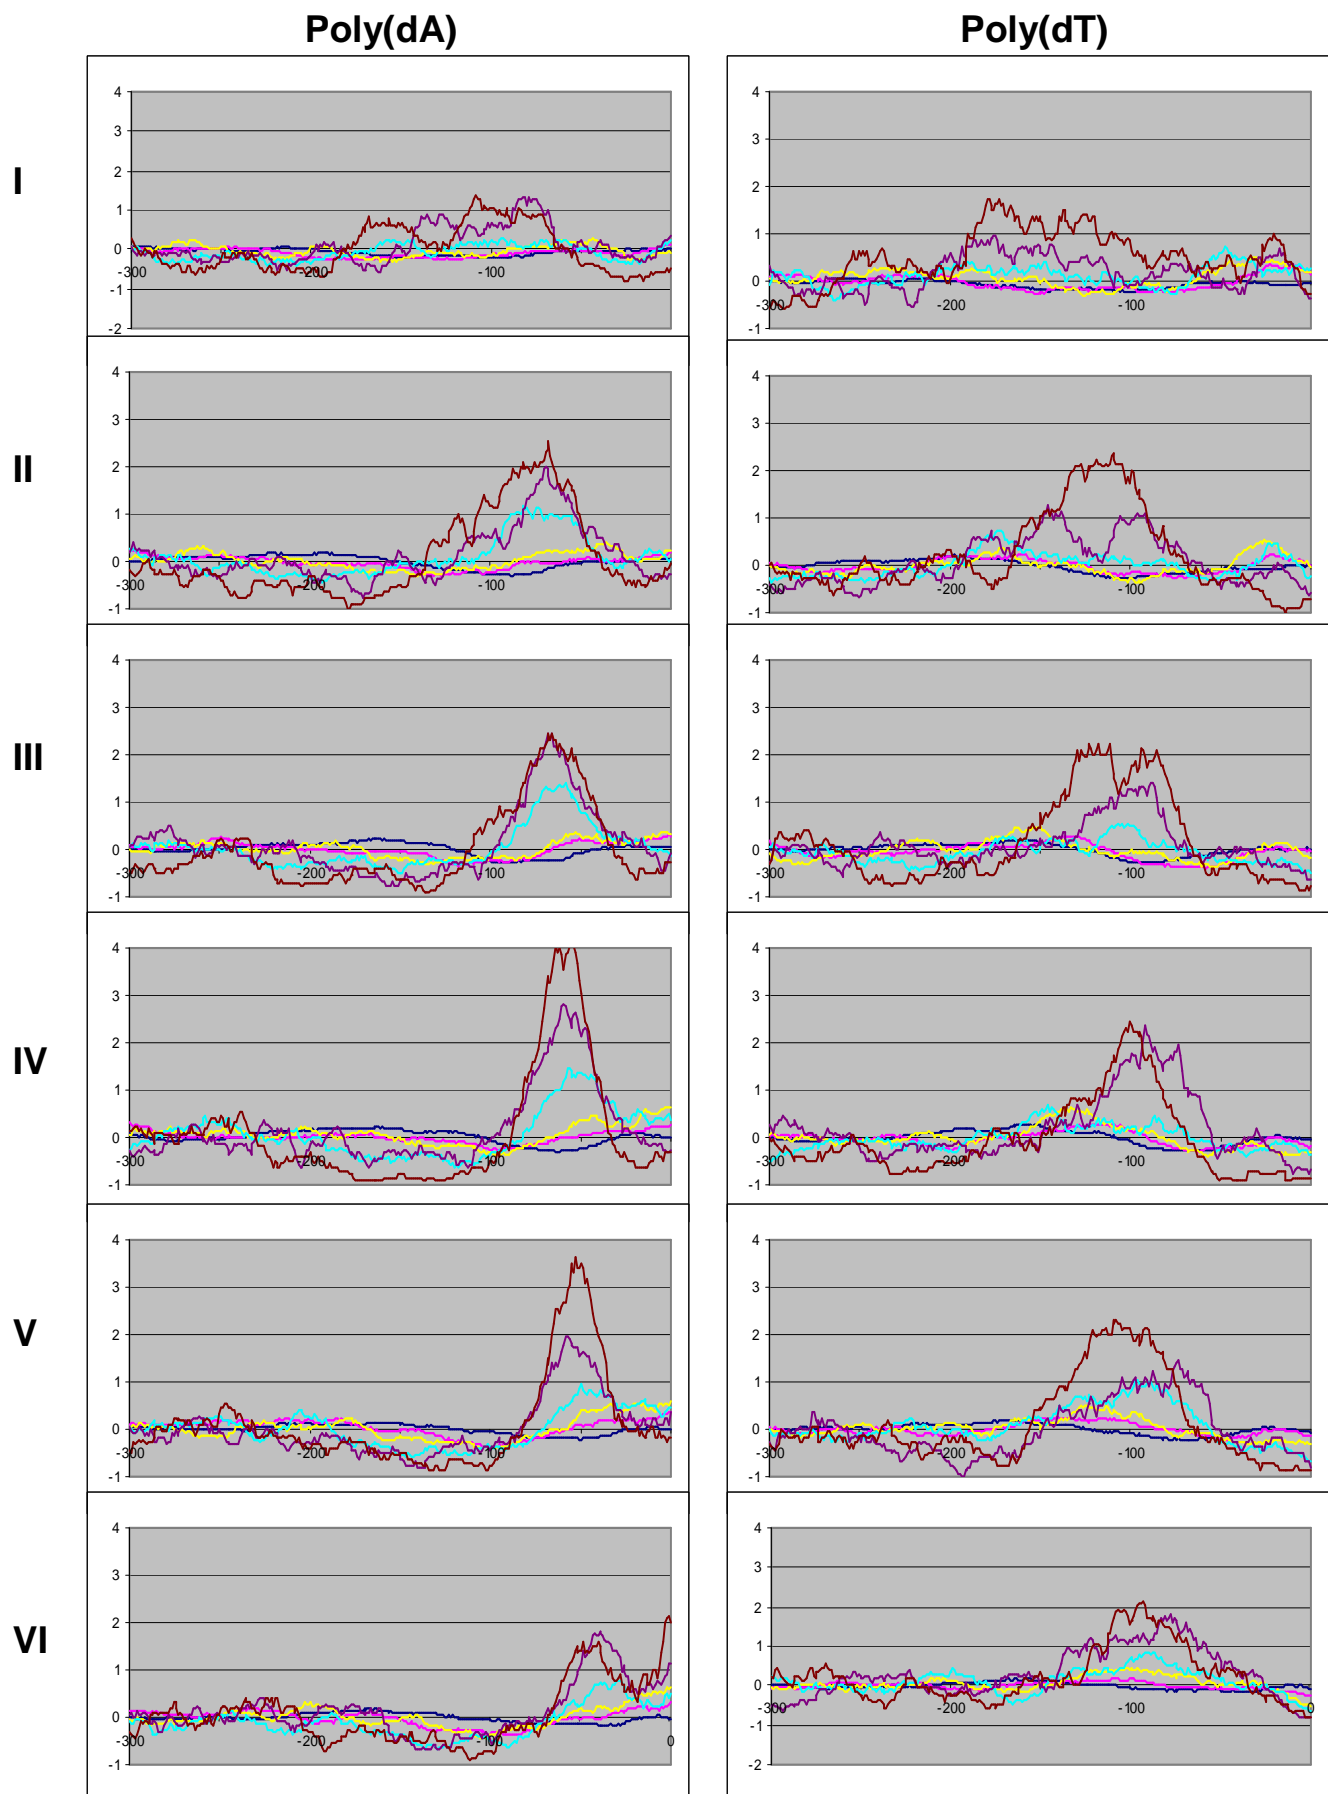

**Supplementary Figure 3**

Poly(dA:dT) enrichments in subgroups of the class I promoters.

Supplement: FigS3.pdf [file FigS3.pdf]
